# Supplementary material for: Investigating Immunotoxicity in Black Carp (Mylopharyngodon piceus) Fingerlings Exposed to Niclosamide
Source: MDPI journal article supplement (doi:10.3390/life14050544), 2024-04-24
Supplement: s1 [file s1]

Table S1 The PCR primers employed for validation of the accuracy of RNA-seq.

| Gene                | Nucleotide sequence (5' - 3')                                    |
|---------------------|------------------------------------------------------------------|
| <i>Muc5</i>         | Forward: TGTGTGAGCATGGGGTGTATA; Reverse: CTGTTGAACTTGCTCTCCAGG   |
| <i>hsp70</i>        | Forward: GTTCCAGCCTATTTCAATGAC; Reverse: ATGTCCTTCTTGTGCTTCCTC   |
| <i>LOC127500040</i> | Forward: CAAGGACAACATCCGAGA; Reverse: TAGACGACACCCCAAGAC         |
| <i>ugt5d1</i>       | Forward: GGATGGAAGCCATTGGGTCA; Reverse: CAAGTCCAGAACCTTCGCCT     |
| <i>hif1a</i>        | Forward: GACTGTAGCAGACCCTGTCCTC; Reverse: AGAGAGGGGTGAGAGAGGTAGC |
| <i>gpr179</i>       | Forward: CAAGTCCAGAACCTTCGCCT; Reverse: GACTGAGTAACCACCCTGGC     |
| <i>ace2</i>         | Forward: CATGGAGTGGTTGAAGGAGG; Reverse: ATGTCATTTGCGTTCCAGGTG    |
| <i>vtg8</i>         | Forward: ; Reverse:                                              |

Table S2 The quality control summary of RNA-seq clean data from *M. piceus* livers.

| Sample | total reads | total bases | q20 bases  | q30 bases  | q20 rate | q30 rate | GC content |
|--------|-------------|-------------|------------|------------|----------|----------|------------|
| Con1   | 53194938    | 7333719284  | 7269716354 | 7121343050 | 0.991273 | 0.971041 | 0.441067   |
| Con2   | 50507236    | 7038299697  | 6976223657 | 6831889308 | 0.991180 | 0.970673 | 0.442533   |
| Con3   | 49170784    | 6742788825  | 6684234752 | 6548107089 | 0.991316 | 0.971127 | 0.436940   |
| NIC1   | 42210450    | 5901843400  | 5849677540 | 5727767509 | 0.991161 | 0.970505 | 0.445428   |
| NIC2   | 53486444    | 7380308561  | 7316129175 | 7165805680 | 0.991304 | 0.970936 | 0.441350   |
| NIC3   | 62012864    | 8598992874  | 8523210304 | 8347367774 | 0.991187 | 0.970738 | 0.445301   |

Table S3 The top 20 highly differentially expressed genes in the liver of *M. piceus* following treatment with NIC concentration.

| Features     | log2FoldChange | Genes name                                           |
|--------------|----------------|------------------------------------------------------|
| Slc22a6l     | -2.8314148     | solute carrier family 22 member 6, like              |
| LOC127515874 | -1.379350875   | /                                                    |
| Aff3         | -2.072885628   | AF4/FMR2 family, member 3                            |
| Ugt5d1       | -1.917067215   | UDP glucuronosyltransferase 5 family, polypeptide D1 |

|                 |              |                                                          |
|-----------------|--------------|----------------------------------------------------------|
| LOC127497333    | -4.242419811 | nuclear receptor coactivator 7-like                      |
| Abcc12          | -1.436705268 | ATP-binding cassette, sub-family C (CFTR/MRP), member 12 |
| LOC127518105    | -1.727033364 | cytochrome P450 3A30                                     |
| Alas1           | -1.729993848 | aminolevulinate, delta-, synthase 1                      |
| Zgc:77439       | -1.465234396 | /                                                        |
| LOC127518436    | -1.515533776 | UDP-glucuronosyltransferase 1-6                          |
| LOC127519991    | -10.19016147 | /                                                        |
| LOC127500040    | -1.698724375 | cytochrome P450 1A1                                      |
| LOC127499674    | -5.20996132  | NAD(P) transhydrogenase, mitochondrial-like              |
| Anpepb.1        | 2.89701828   | alanyl (membrane) aminopeptidase b, tandem duplicate 1   |
| LOC127499742    | 2.431376745  | ADP-ribosylation factor 4                                |
| Nr0b1           | 1.973350957  | nuclear receptor subfamily 0, group B, member 1          |
| LOC127500841    | 8.785602796  | class I histocompatibility antigen, F10 alpha chain      |
| LOC127508890    | 2.339228177  | galectin-9-like                                          |
| Asah1b          | 1.495228526  | N-acylsphingosine amidohydrolase (acid ceramidase) 1b    |
| Si:dkeyp-72g9.4 | 2.014206852  | /                                                        |

Table S4 The top 20 enriched GO terms in the liver of *M. piceus* following treatment with NIC concentration.

| GO ID      | <i>p.adjust</i> | Description                                      | Count | Category           |
|------------|-----------------|--------------------------------------------------|-------|--------------------|
| GO:0072562 | 4.76E-10        | Blood microparticle                              | 8     | Cellular component |
| GO:0005576 | 8.14E-06        | Extracellular region                             | 15    | Cellular component |
| GO:0042627 | 1.05E-06        | Chylomicron                                      | 4     | Cellular component |
| GO:0034364 | 1.63E-06        | High-density lipoprotein particle                | 4     | Cellular component |
| GO:0070328 | 6.57E-06        | Triglyceride homeostasis                         | 4     | Biological Process |
| GO:0006695 | 1.82E-05        | Cholesterol biosynthetic process                 | 4     | Biological Process |
| GO:0034372 | 1.05E-06        | Very-low-density lipoprotein particle remodeling | 4     | Biological Process |

|            |          |                                                     |   |                    |
|------------|----------|-----------------------------------------------------|---|--------------------|
| GO:0042632 | 0.000104 | Cholesterol homeostasis                             | 4 | Biological Process |
| GO:0042157 | 0.000154 | Lipoprotein metabolic process                       | 4 | Biological Process |
| GO:0043691 | 1.05E-06 | Reverse cholesterol transport                       | 4 | Biological Process |
| GO:0034620 | 0.00026  | Cellular response to unfolded protein               | 3 | Biological Process |
| GO:0033344 | 3.49E-06 | Cholesterol efflux                                  | 4 | Biological Process |
| GO:0008286 | 0.00063  | Insulin receptor signaling pathway                  | 3 | Biological Process |
| GO:0030374 | 0.000841 | Nuclear receptor transcription coactivator activity | 3 | Molecular function |
| GO:0031072 | 0.000841 | Heat shock protein binding                          | 3 | Molecular function |
| GO:0051787 | 0.001091 | Misfolded protein binding                           | 3 | Molecular function |
| GO:0005506 | 0.000399 | Iron ion binding                                    | 7 | Molecular function |
| GO:0015485 | 0.000246 | Cholesterol binding                                 | 4 | Molecular function |
| GO:0016712 | 2.24E-05 | Oxidoreductase activity                             | 5 | MF                 |
| GO:0020037 | 5.95E-06 | Heme binding                                        | 9 | MF                 |

Table S5 The top 20 enriched KEGG terms in the liver of *M. piceus* following treatment with NIC concentration.

| KEGG ID | <i>p.adjust</i> | Description                                   | Count |
|---------|-----------------|-----------------------------------------------|-------|
| ko05204 | 5.43E-12        | Chemical carcinogenesis - DNA adducts         | 9     |
| ko00830 | 4.32E-11        | Retinol metabolism                            | 10    |
| ko00982 | 3.10E-09        | Drug metabolism - cytochrome P450             | 7     |
| ko00140 | 1.33E-08        | Steroid hormone biosynthesis                  | 8     |
| ko00980 | 3.22E-08        | Metabolism of xenobiotics by cytochrome P450  | 7     |
| ko04976 | 2.35E-06        | Bile secretion                                | 7     |
| ko04360 | 4.57E-06        | Axon guidance                                 | 9     |
| ko05207 | 4.87E-06        | Chemical carcinogenesis - receptor activation | 9     |
| ko04924 | 8.89E-06        | Renin secretion                               | 6     |
| ko04923 | 8.38E-05        | Regulation of lipolysis in adipocytes         | 5     |

|         |          |                                         |    |
|---------|----------|-----------------------------------------|----|
| ko04020 | 8.60E-05 | Calcium signaling pathway               | 9  |
| ko04022 | 0.000187 | cGMP-PKG signaling pathway              | 7  |
| ko04919 | 0.000269 | Thyroid hormone signaling pathway       | 6  |
| ko04080 | 0.000303 | Neuroactive ligand-receptor interaction | 11 |
| ko04970 | 0.000405 | Salivary secretion                      | 5  |
| ko04658 | 0.000501 | Th1 and Th2 cell differentiation        | 5  |
| ko05168 | 0.000635 | Herpes simplex virus 1 infection        | 7  |
| ko04072 | 0.000673 | Phospholipase D signaling pathway       | 6  |
| ko00590 | 0.000968 | Arachidonic acid metabolism             | 4  |
| ko04614 | 0.001242 | Renin-angiotensin system                | 3  |

---
